# Supplementary material
Source: Research Square preprint supplement (doi:10.21203/rs.3.rs-10131555/v1)
Supplement: Supplementary file 1 [file db6de85dab60d89982cef31e.docx]

**Research Proposal Feedback Coding Guidelines**

**Part 1: Coding feedback items**

Instructions: Use the coding guide below to label individual feedback items in each sample. Each item represents a category and may have additional detail codes with it. Coders should add detail codes based on the content or tone of each feedback item.

1. Feedback about the Task (FT): whether work is correct or incorrect; may include directions to include more, less, or different information

Examples

- Include more detail about sample
- Comments about relating project to medical education
- Comments about including a theoretical framework

2. Feedback about the Process (FP): comments about the process of writing the proposal or conducting research

Examples

- Comments about clarity or re-organization of a section
- Comments about addressing previous feedback
- Concerns about scope of project or timeline

3. Feedback about Self-Regulation (FR): recommendations about knowledge, skills, or abilities that will help with the research process or career development outside of the proposal

Examples

- Comments about discussing process with mentor
- Comments about next steps or future plans
- Recommendations for lifelong learning or future tasks

4. Feedback about the Self as a Person (FS): comments about student performance that are unrelated to the proposal or the research process; broad praise or negative comments

Examples

- “You are a great student”
- Great job [with no specific qualifiers about the proposal or effort]

**Part 2: Overall Feedback**

Instructions: Note for each sample which of the feedback questions below were addressed based on holistic comments. Coders should check the appropriate boxes at the end of each sample proposal.

Question 1: Where am I going?

Feedback comments gave specific goals for future drafts or versions of the proposal/manuscript OR challenged students to think about and set their own research goals by asking targeted questions about the research process.

Question 2: How am I going to get there?

Feedback provides instructions, suggestions, and/or resources for moving the proposal or research process forward. This may include specific questions or discussions for the student’s mentor/project team.

Question 3: Where to next?

Feedback includes instructions, suggestions, and/or resources to help the student set or meet goals outside the confines of the proposal or current research project. This includes lifelong learning resources or general suggestions for quality writing or research.
